# Supplementary material for: Motivational components involved in the metamotivational monitoring in medical students
Source: Research Square preprint supplement (doi:10.21203/rs.3.rs-2169741/v1), 2022-11-01
Supplement: Supplementary file 1 [file 318c2ab292dbaa47b30297c0.docx]

Appendix 3– Structural model of predictive relationship between motivational regulation strategies and motivational components  **(**The numbers inside ellipses are the R2 values**)**


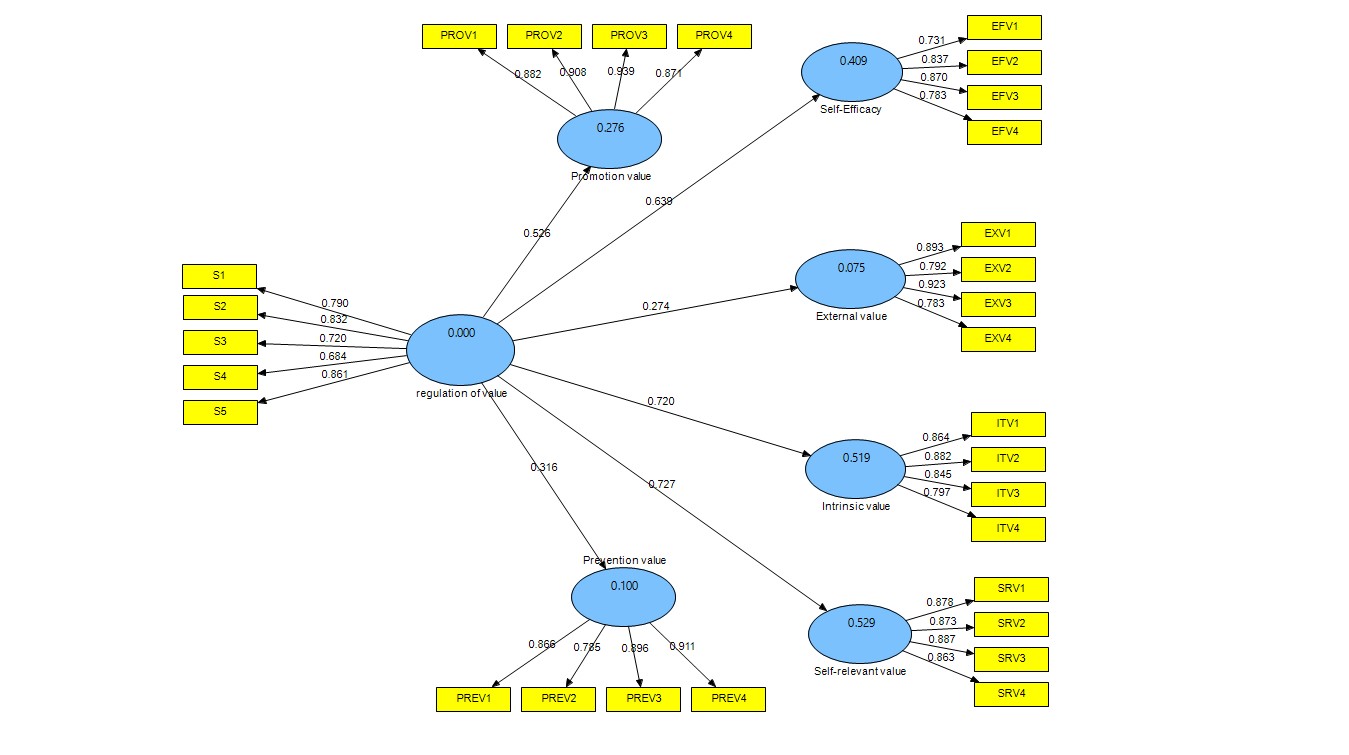


Figure 1: Structural model and predictive relationship between regulation of value strategy and motivational components


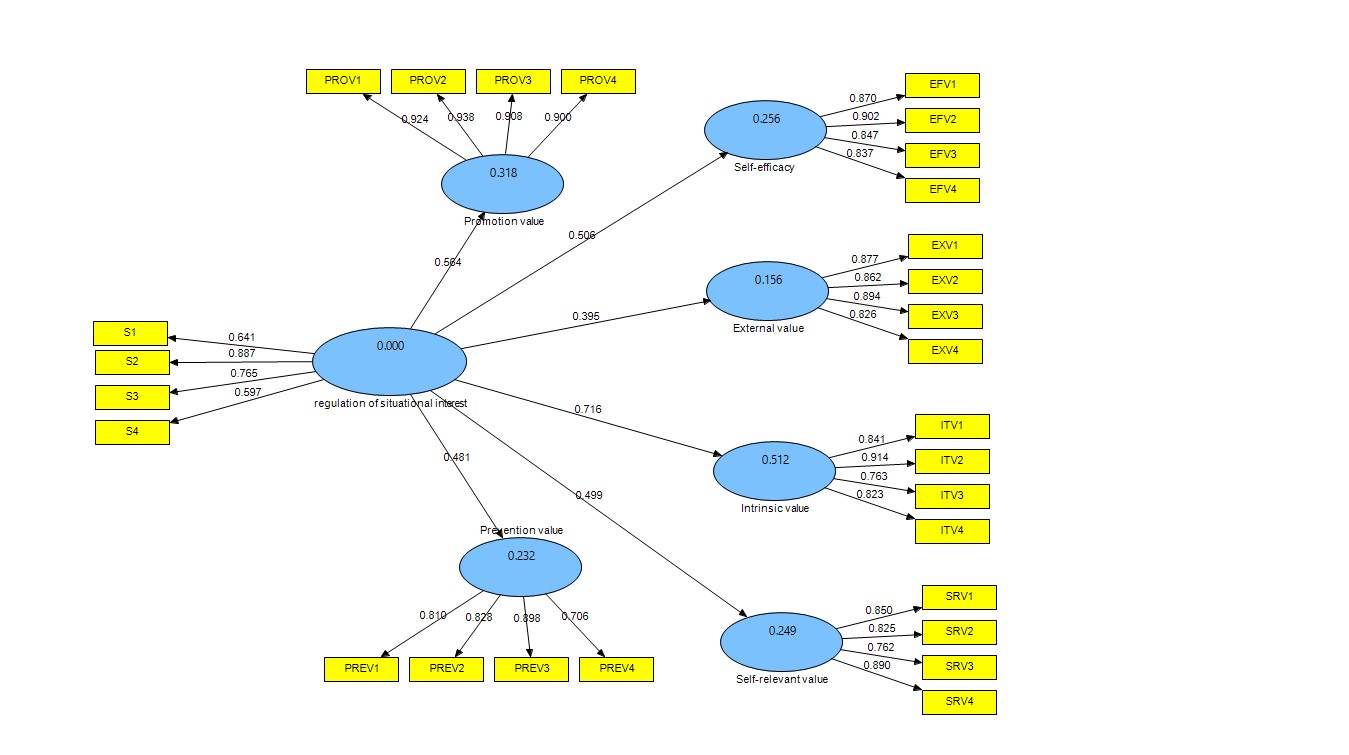


Figure 2: Structural model and predictive relationship between regulation of situational interest strategy and motivational components


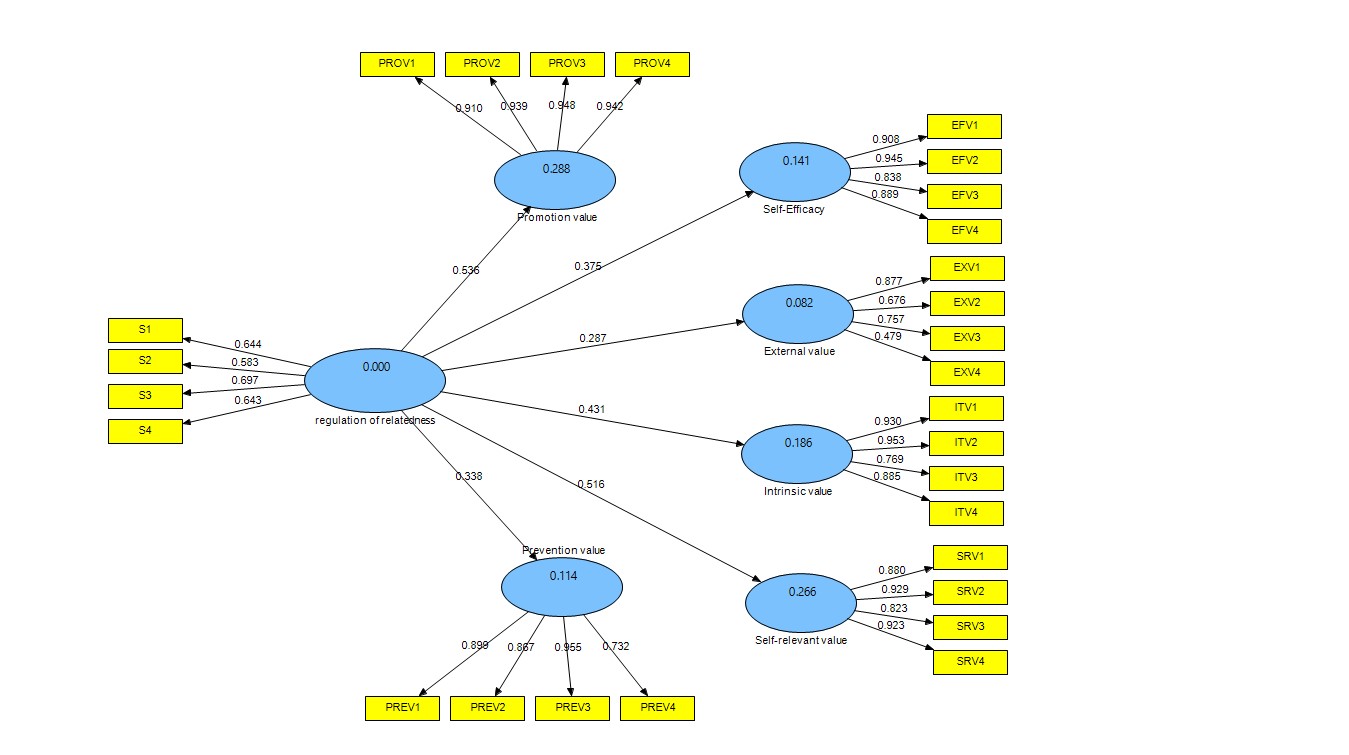


Figure 3: Structural model and predictive relationship between regulation of relatedness strategy and motivational components


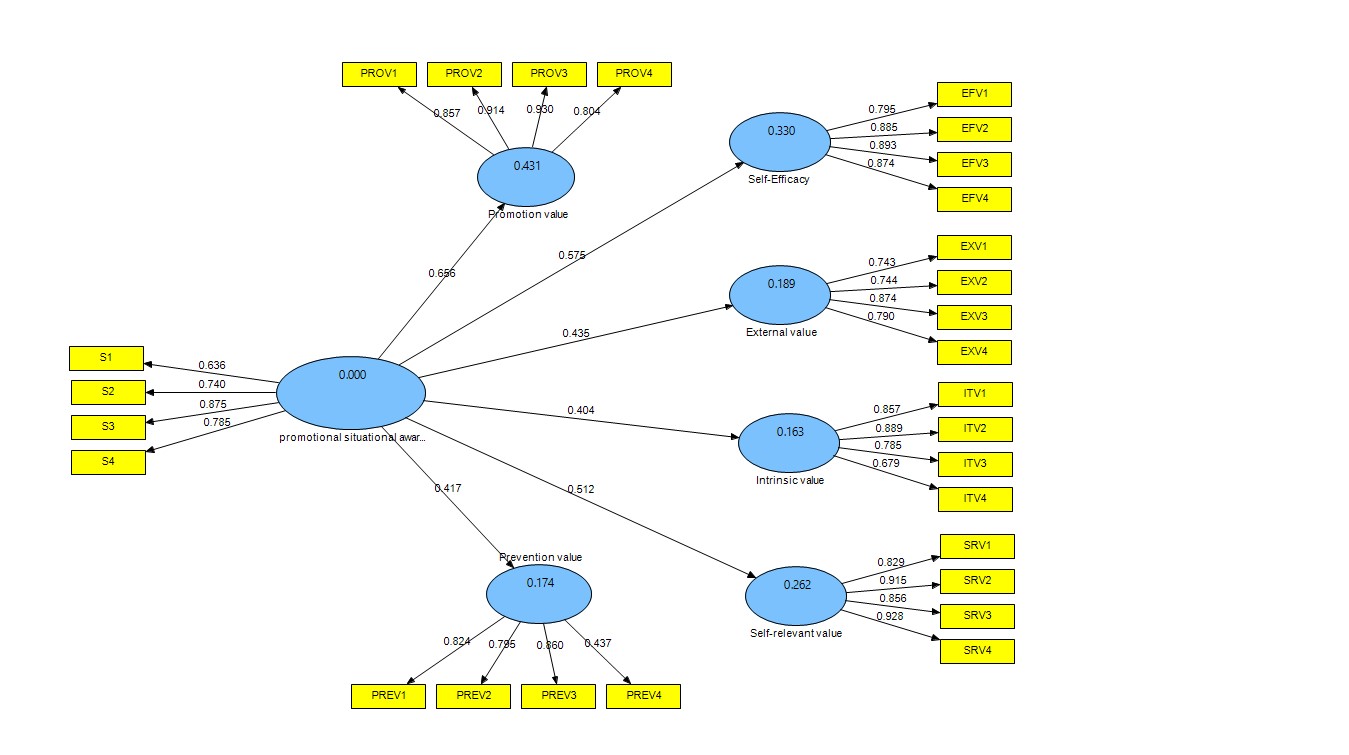


Figure 4: Structural model and predictive relationship between promotional situational awareness strategy and motivational components


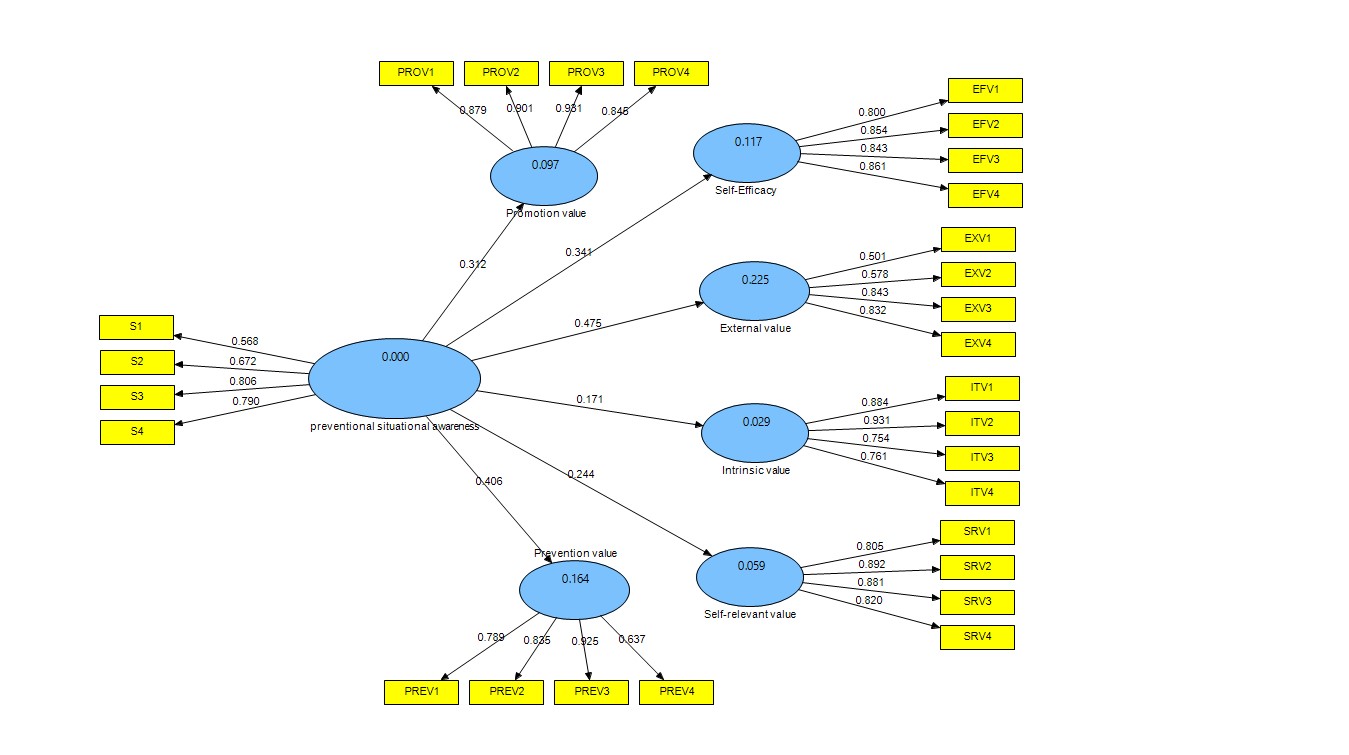


Figure 5: Structural model and predictive relationship between preventional situational awareness strategy and motivational components


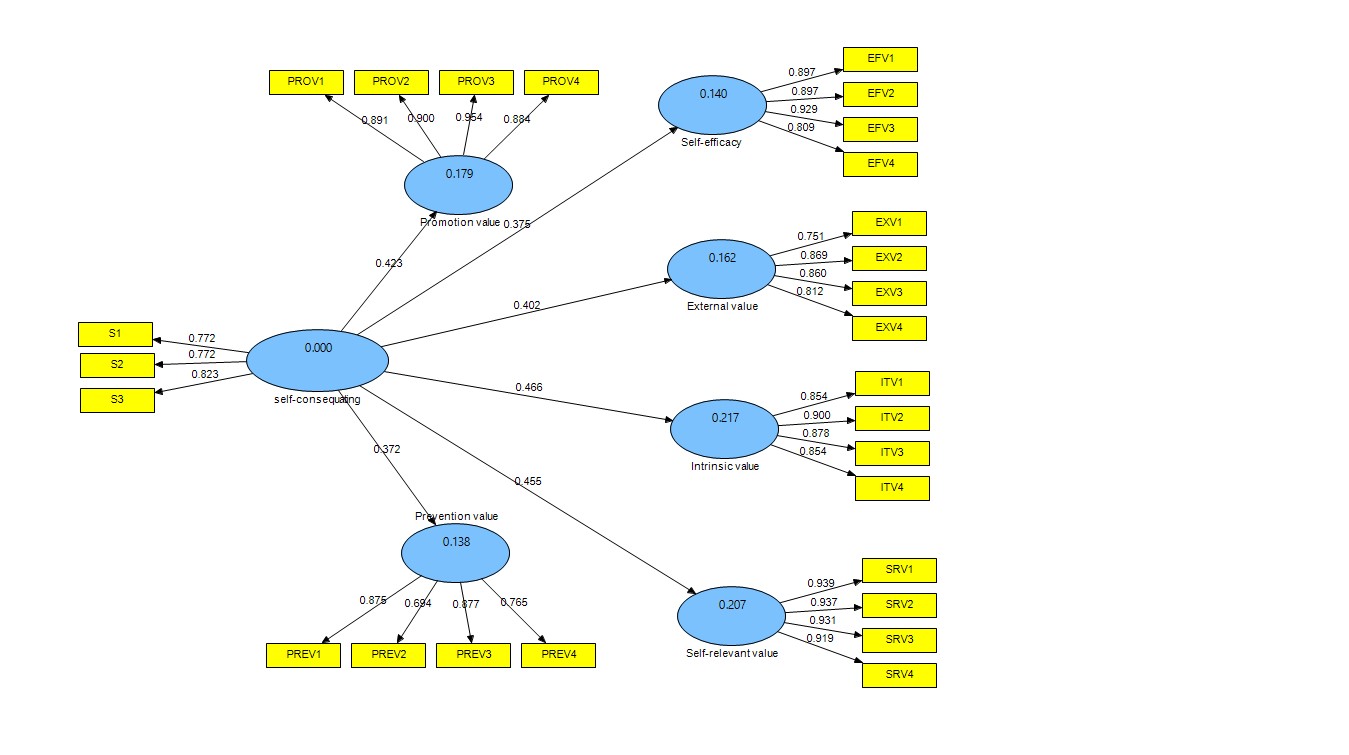


Figure 6: Structural model and predictive relationship between self-consequating strategy and motivational components


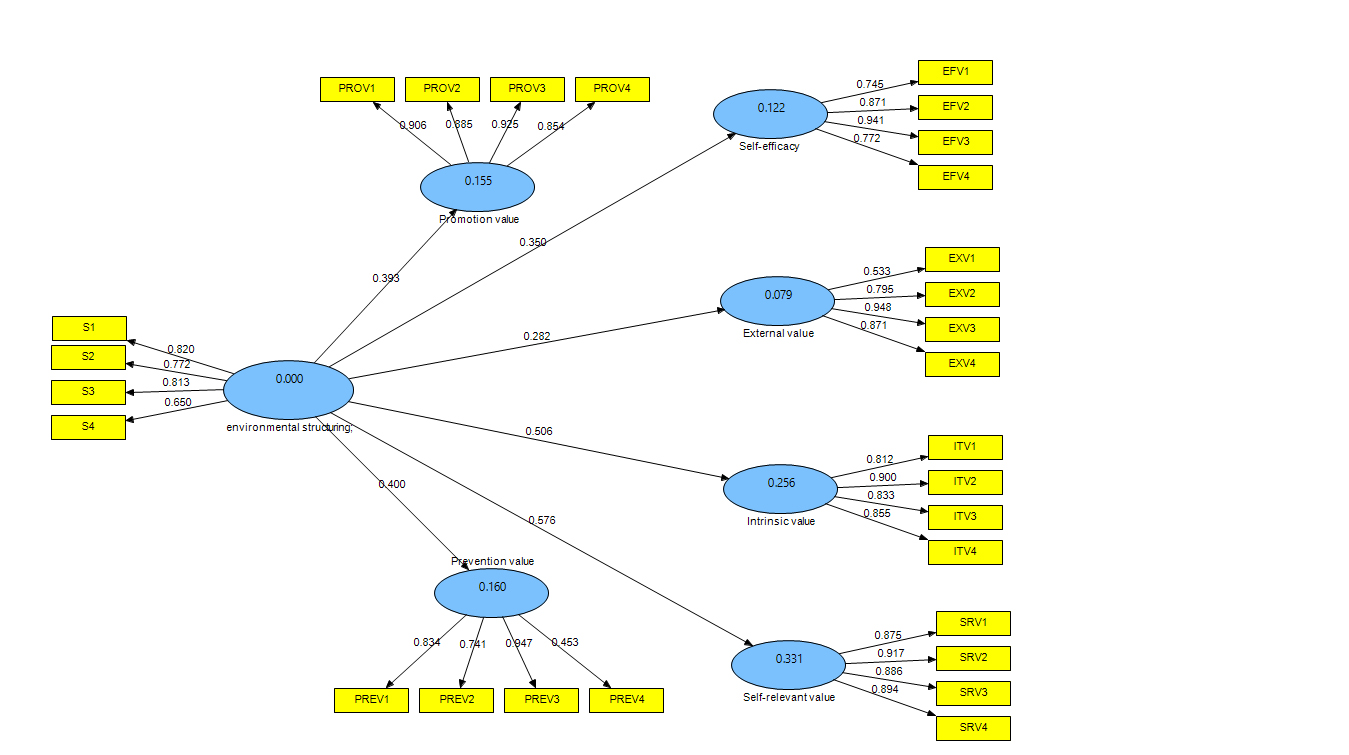


Figure 7: Structural model and predictive relationship between environmental structuring strategy and motivational components (Before deleting item PREV4)


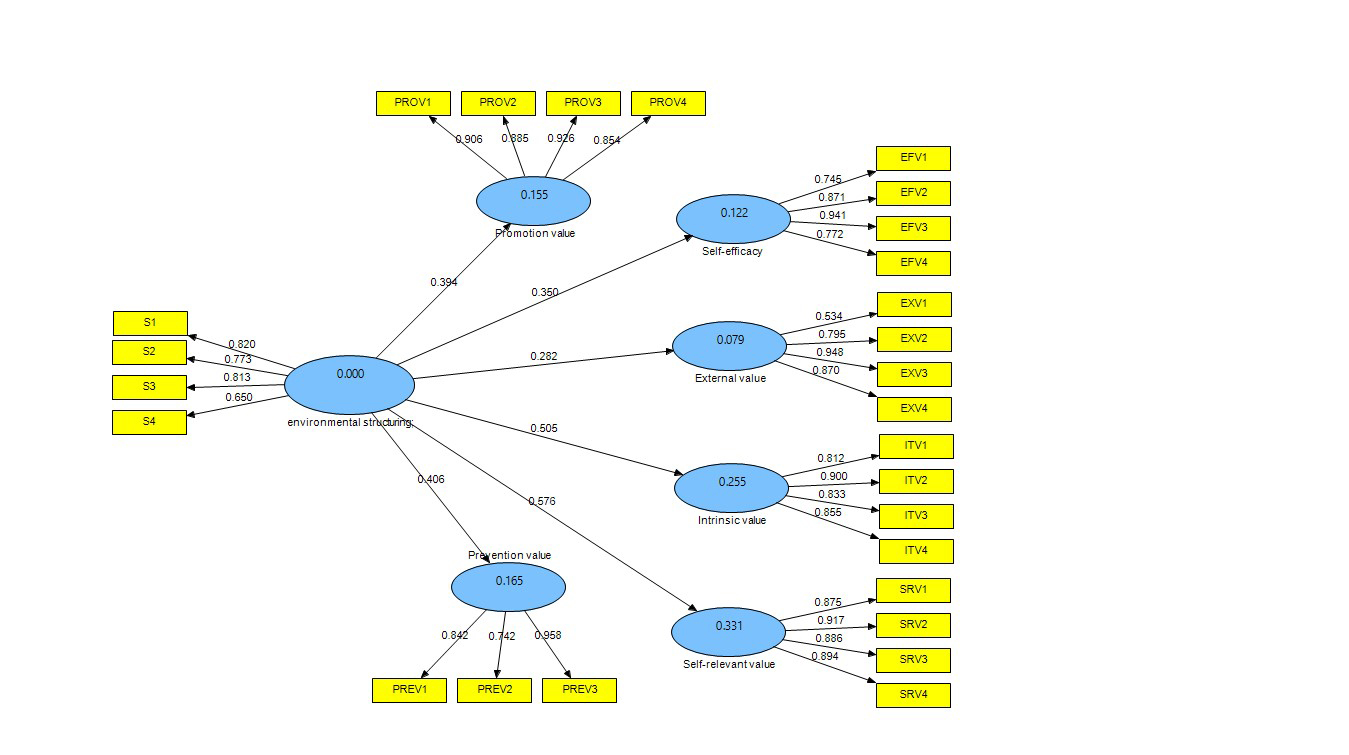


Figure 8: Structural model and predictive relationship between environmental structuring strategy and motivational components (After deleting item PREV4)
